# Supplementary material for: De Novo Potent Peptide Nucleic Acid Antisense Oligomer Inhibitors Targeting SARS-CoV-2 RNA-Dependent RNA Polymerase via Structure-Guided Drug Design
Source: MDPI journal article supplement (doi:10.3390/ijms242417473), 2023-12-14
Supplement: s1 [file s1]

# De Novo Potent Peptide Nucleic Acid Antisense Oligomer Inhibitors Targeting SARS-CoV-2 RNA-Dependent RNA Polymerase via Structure-Guided Drug Design

Kiran Shehzadi, Mingjia Yu \* and Jianhua Liang \*

Key Laboratory of Medical Molecule Science and Pharmaceutical Engineering, Ministry of Industry and Information Technology, School of Chemistry and Chemical Engineering, Beijing Institute of Technology, Beijing 10081, China; kiranshehzadi@bit.edu.cn

\* Correspondence: 6120210204@bit.edu.cn (M.Y.); ljhbit@bit.edu.cn (J.L.)

**Abstract:** Global reports of novel SARS-CoV-2 variants and recurrence cases continue despite substantial vaccination campaigns, raising severe concerns about COVID-19. While repurposed drugs offer some treatment options for COVID-19, notably, nucleoside inhibitors like Remdesivir stand out as curative therapies for COVID-19 that are approved by the US Food and Drug Administration (FDA). The emergence of highly contagious SARS-CoV-2 variants underscores the imperative for antiviral drugs adaptable to evolving viral mutations. RNA-dependent RNA polymerase (RdRp) plays a key role in viral genome replication. Currently, inhibiting viral RdRp function remains a pivotal strategy to tackle the notorious virus. Peptide nucleic acid (PNA) therapy shows promise by effectively targeting specific genome regions, reducing viral replication, and inhibiting infection. In our study, we designed PNA antisense oligomers conjugated with cell-penetrating peptides (CPP) aiming to evaluate their antiviral effects against RdRp target using structure-guided drug design, which involves molecular docking simulations, drug likeliness and pharmacokinetic evaluations, molecular dynamics simulations, and computing binding free energy. The in silico analysis predicts that chemically modified PNAs might act as antisense molecules in order to disrupt ribosome assembly at RdRp's translation start site, and their chemically stable and neutral backbone might enhance sequence-specific RNA binding interaction. Notably, our findings demonstrate that PNA-peptide conjugates might be the most promising inhibitors of SARS-CoV-2 RdRp, with superior binding free energy compared to Remdesivir in the current COVID-19 medication. Specifically, PNA-CPP-1 could bind simultaneously to the active site residues of RdRp protein and sequence-specific RdRp-RNA target in order to control viral replication.

**Keywords:** peptide nucleic acid; cell-penetrating peptide; RdRp; RdRp-RNA; SARS-CoV-2

---

## List of Figures:

**Figure S1.** Superposition of Cryo-EM structures of RdRp and RdRp-RNA.....3

|                                                                                                                                                                                                         |                                     |
|---------------------------------------------------------------------------------------------------------------------------------------------------------------------------------------------------------|-------------------------------------|
| <b>Figure S2.</b> Targeted gene sequence of SARS-CoV-2 RdRp used for designed complimentary PNA analogues.....                                                                                          | 4                                   |
| <b>Figure S3.</b> The interaction analysis of PNA-CPP-1 with SARS-CoV-2 RdRp (blind docking analysis).....                                                                                              | 5                                   |
| <b>Figure S4.</b> The 2D diagram of interactions between PNA-CPP-1 and RdRp.....                                                                                                                        | 6                                   |
| <b>Figure S5.</b> The 2D diagram of interactions between PNA-CPP-1 lead compound and RdRp-RNA target...                                                                                                 | 7                                   |
| <b>Figure S6.</b> The interaction analysis of natural nucleotide and PNA-CPP-1 with SARS-CoV-2 RdRp-RNA.....                                                                                            | 8                                   |
| <b>Figure S7.</b> The interaction analysis of ATP with RdRp-RNA and RdRp-RNA-PNA complex.....                                                                                                           | 8                                   |
| <b>Figure S8.</b> Validation of same binding cavity by superimposition of Remdesivir and PNA-CPP-1 complex with RdRp-RNA (PDB ID: 7BV2).....                                                            | 9                                   |
| <b>Figure S9.</b> Validation of same binding cavity by superimposition of Remdesivir and PNA-CPP-1 complex with RdRp (PDB ID: 7BTF).....                                                                | 9                                   |
| <b>Figure S10.</b> $\alpha$ distances of the binding pocket residues of PNA-CPP-1-RdRp-RNA (PDB ID: 7BV2) complex during SMD ((A) 6 pN, (B) 8 pN, (C) 10 pN) simulations.....                           | 10                                  |
| <b>Figure S11.</b> $\alpha$ distances of the binding pocket residues of PNA-CPP-1-RdRp (PDB ID: 7BTF) complex during SMD ((A) 6 pN, (B) 8 pN, (C) 10 pN) simulations.....                               | 11                                  |
| <b>Figure S12.</b> Radius of gyration (Rg) of PNA-CPP-1 with RdRp and RdRp-RNA.....                                                                                                                     | 12                                  |
| <b>Figure S13.</b> SASA analysis of PNA-CPP-1 complexes.. ..                                                                                                                                            | 12                                  |
| <b>Figure S14.</b> The RMSD profiles of 800 ns MD simulations of unbound receptor (RdRp) and ligand (PNA-CPP-1).....                                                                                    | 13                                  |
| <b>Figure S15.</b> Radius of gyration (Rg) of RdRp in the absence of PNA-CPP-1 during 800 ns MD simulation. ....                                                                                        | <b>Error! Bookmark not defined.</b> |
| <b>Figure S16.</b> Interaction analysis of two complexes of PNA-CPP-1 with RdRp-RNA (PDB ID: 7BV2) including the initial and final structures obtained from MD.....                                     | 14                                  |
| <b>Figure S17.</b> The interaction analysis of Remdesivir and PNA-CPP-1 with SARS-CoV-2 RdRp-RNA.....                                                                                                   | 15                                  |
| <b>Figure S18.</b> The 3D interaction analysis indicating distance between the atoms that form hydrogen bonds.. ..                                                                                      | 16                                  |
| <b>Figure S19.</b> The evolution of interatomic distances between chemical functions of the PNA-CPP-1 ligand and key amino acids residues in the binding sites during molecular dynamic simulation..... | 17                                  |
| <b>Figure S20.</b> MMPBSA analysis of PNA-CPP-1-RdRp and PNA-CPP-1-RdRp-RNA complex.....                                                                                                                | 18                                  |

#### List of Tables:

|                                                                                                                                                      |    |
|------------------------------------------------------------------------------------------------------------------------------------------------------|----|
| <b>Table S1.</b> The binding free energy PNA-CPP-1 with RdRp and RdRp-RNA by docking and MMPBSA analysis.....                                        | 18 |
| <b>Table S2.</b> Potential drug binding cavities of RdRp detected by Cavity Plus. The amino acid residues of druggable cavities 1, 2, 3, and 4. .... | 19 |
| <b>Table S3.</b> The detailed information on non-bond forces of PNA-CPP-1 leading compound and SARS-CoV-2 RdRp in cavity 1 (PDB ID: 7BTF).....       | 20 |

|                                                                                                                                                                                                       |    |
|-------------------------------------------------------------------------------------------------------------------------------------------------------------------------------------------------------|----|
| <b>Table S4.</b> The detailed information on non-bond forces of PNA-CPP-1 leading compound and SARS-CoV-2 RdRp in cavity 2 (PDB ID: 7BTF).....                                                        | 21 |
| <b>Table S5.</b> The detailed information on non-bond forces of PNA-CPP-1 leading compound and SARS-CoV-2 RdRp in cavity 3 (PDB ID: 7BTF).....                                                        | 22 |
| <b>Table S6.</b> The detailed information on non-bond forces of PNA-CPP-1 leading compound and SARS-CoV-2 RdRp in cavity 4 (PDB ID: 7BTF).....                                                        | 24 |
| <b>Table S7.</b> The detailed information on non-bond forces of PNA-CPP-1 leading compound in Remdesivir binding cavity targeting template RNA in complex with RdRp of SARS-CoV-2 (PDB ID: 7BV2)..... | 25 |

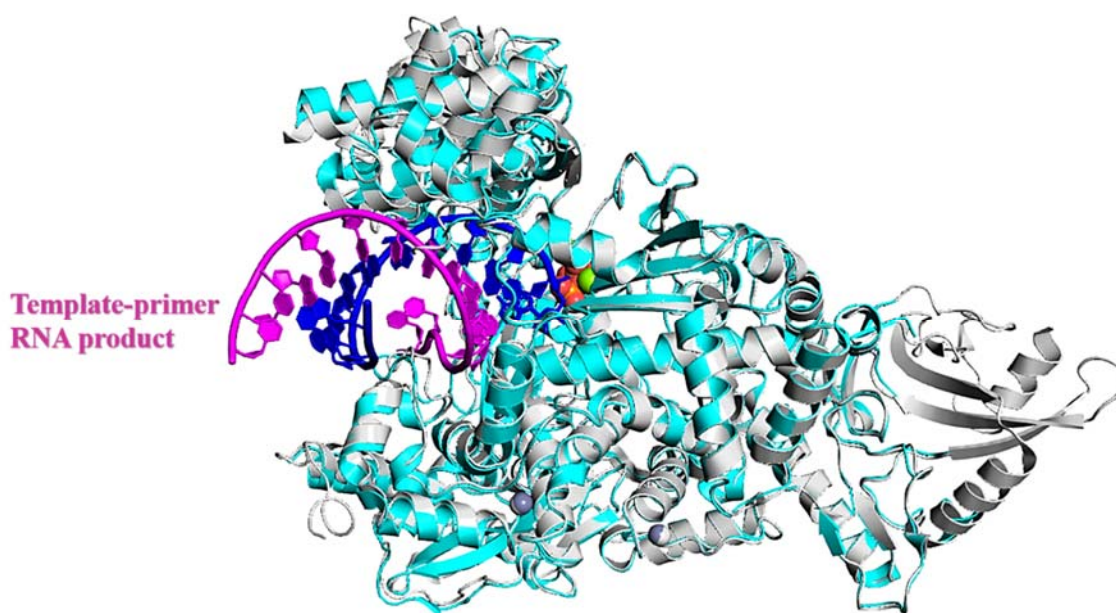

**Figure S1.** Superposition of Cryo-EM structures of RdRp and RdRp-RNA. RdRp (PDB ID: 7BTF, grey color) and RdRp bound to the template-primer RNA and triphosphate form of Remdesivir (PDB ID: 7BV2, cyan color). The RMSD value of systems aligned by PyMOL is 0.444.

**Genome Sequence of SARS-CoV-2 RdRp:** (NCBI Reference Sequence: NC\_045512.2 from 13442 to 16236 bp)

TCAGCTGATGCACAATCGTTTTTAAACGGGTTTGCGGTGTAAGTGCAGCCCGTCTTACACCGTGCGGCACAGGCACTAGTACTG  
 ATGTCGTATACAGGGCTTTTGACATCTACAATGATAAAGTAGCTGGTTTTGCTAAATTCCTAAAACTAATTGTTGTCGCTTCCAAG  
 AAAAGGACGAAGATGACAATTAATTGATTCTTACTTTGTAGTTAAGAGACACACTTTCTCTAACTACCAACATGAAGAAACAATT  
 TATAATTTACTTAAGGATTGTCCAGCTGTTGCTAAACATGACTTCTTTAAGTTTAGAATAGACGGTGACATGGTACCACATATATCAC  
 GTCAACGTCTTACTAAATACACAATGGCAGACCTCGTCTATGCTTTAAGGCATTTTGATGAAGGTAATTGTGACACATTAAAGAA  
 ATACTTGTACATACAATTGTTGTGATGATGATTATTTCAATAAAAAGGACTGGTATGATTTTGTAGAAAACCCAGATATATTACGCG  
 TATACGCCAACTTAGGTGAACGTGTACGCCAAGCTTTGTTAAAAACAGTACAA

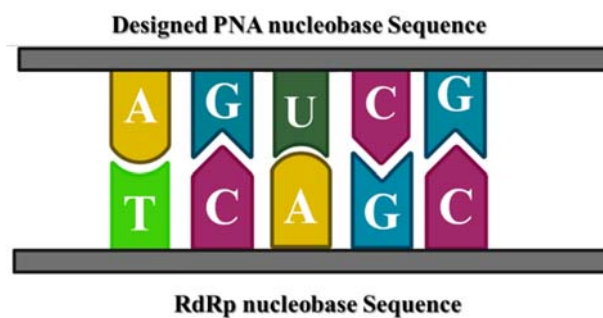

**Figure S2.** Targeted gene sequence of SARS-CoV-2 RdRp used for designed complimentary PNA analogues.

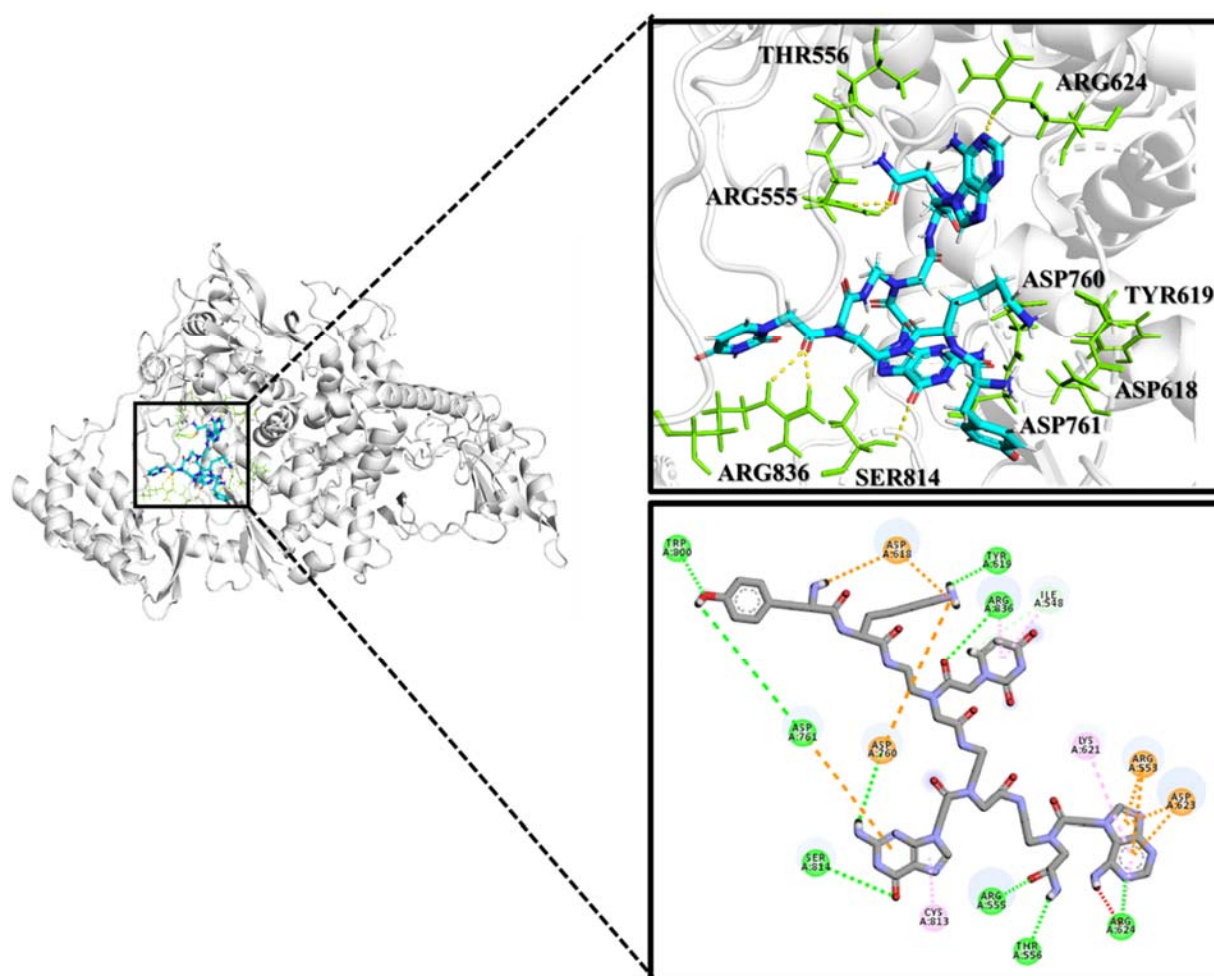

**Figure S3.** The interaction analysis of PNA-CPP-1 with SARS-CoV-2 RdRp (blind docking analysis). Close-up view of 3D and 2D interaction diagram of PNA-CPP-1 with RdRp (PDB ID: 7BTF). The Cartoon model represents the binding pocket of RdRp protein. PNA-CPP-1 bind at the experimental reported binding site of RdRp protein are represented as cartoon models. Amino acid form H-bond colored in green.

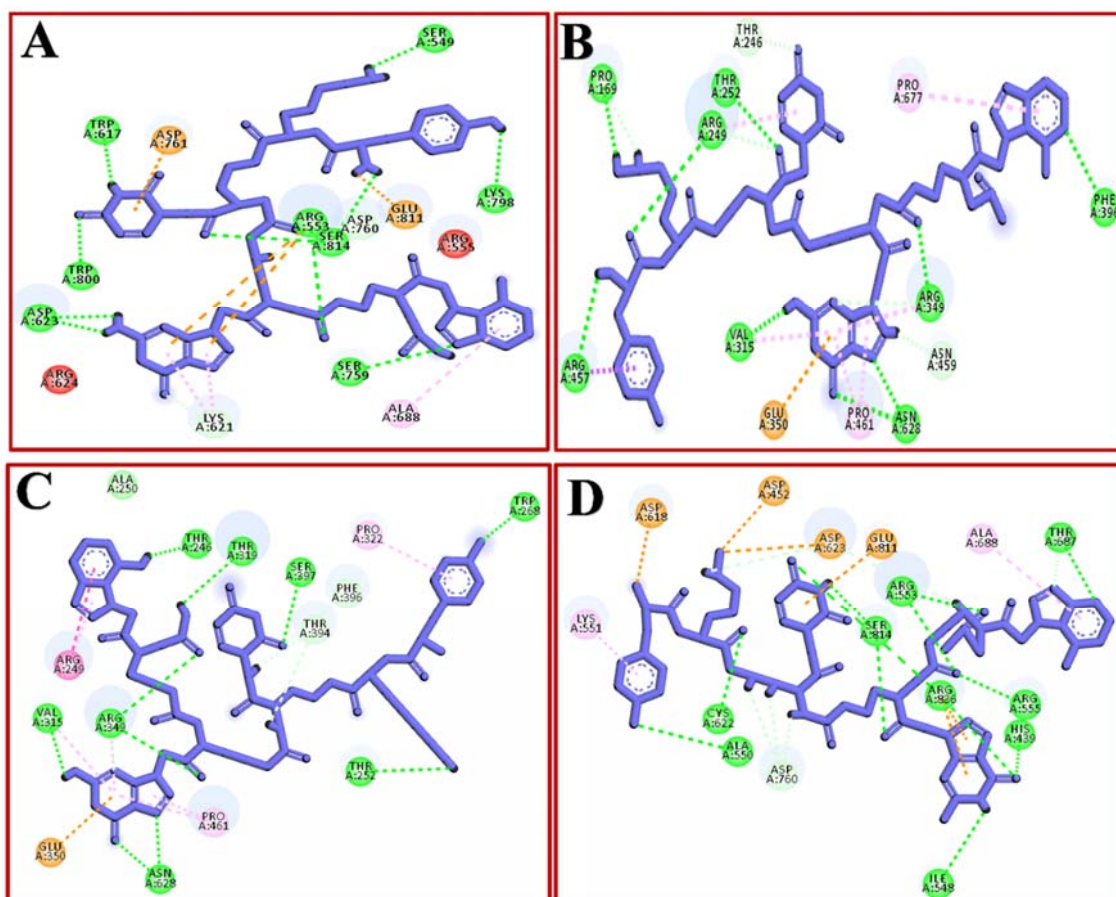

**Figure S4.** The 2D diagram of interactions between PNA-CPP-1 and RdRp. 2D interaction analysis of PNA-CPP-1(leading ligand) in the predicted binding cavities of RdRp (PDB ID: 7BTF) of SARS-CoV-2. **(A)** PNA-CPP-1 in druggable cavity1 of RdRp. **(B)** PNA-CPP-1 in druggable cavity 2 of RdRp. **(C)** PNA-CPP-1 in druggable cavity 3 of RdRp. **(D)** PNA-CPP-1 in druggable cavity 4 of RdRp. Green line showing conventional hydrogen bond with catalytic residues, orange and pink color represent the hydrophobic interactions.

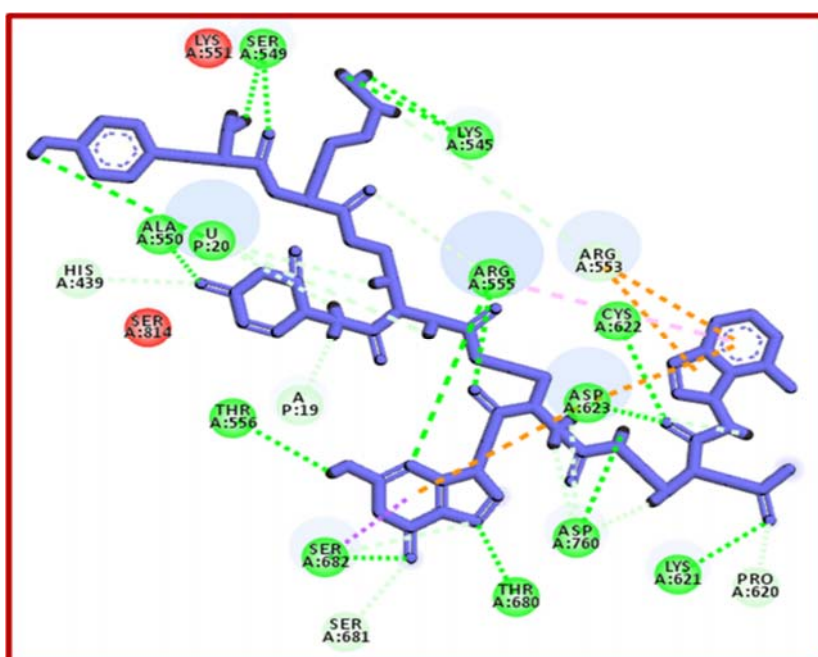

**Figure S5.** The 2D diagram of interactions between PNA-CPP-1 lead compound and RdRp-RNA target. 2D interaction analysis of PNA-CPP-1 binding at the growth site of RdRp-RNA.



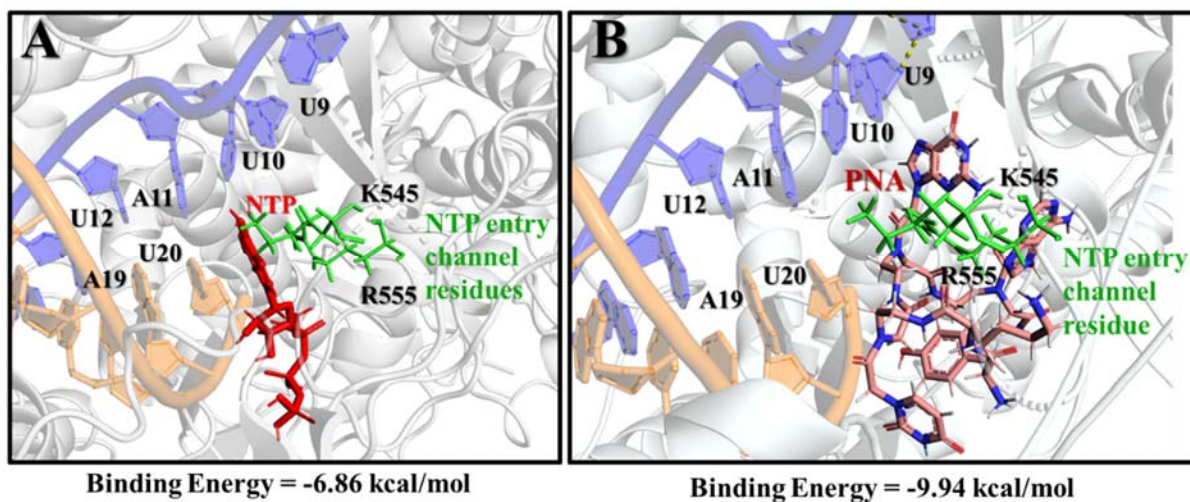

**Figure S6.** The interaction analysis of natural nucleotide and PNA-CPP-1 with SARS-CoV-2 RdRp-RNA. **(A)** Close-up view of 3D interaction diagram of ATP with RdRp-RNA (PDB ID: 7BV2) represents ATP incorporation into the primer strand of RNA and base-stacking interaction with U10 base of template strand. **(B)** Close-up view of 3D interaction diagram of PNA-CPP-1 with RdRp-RNA (PDB ID: 7BV2) represents PNA-CPP-1 incorporation into the primer strand of RNA at the place of ATP.

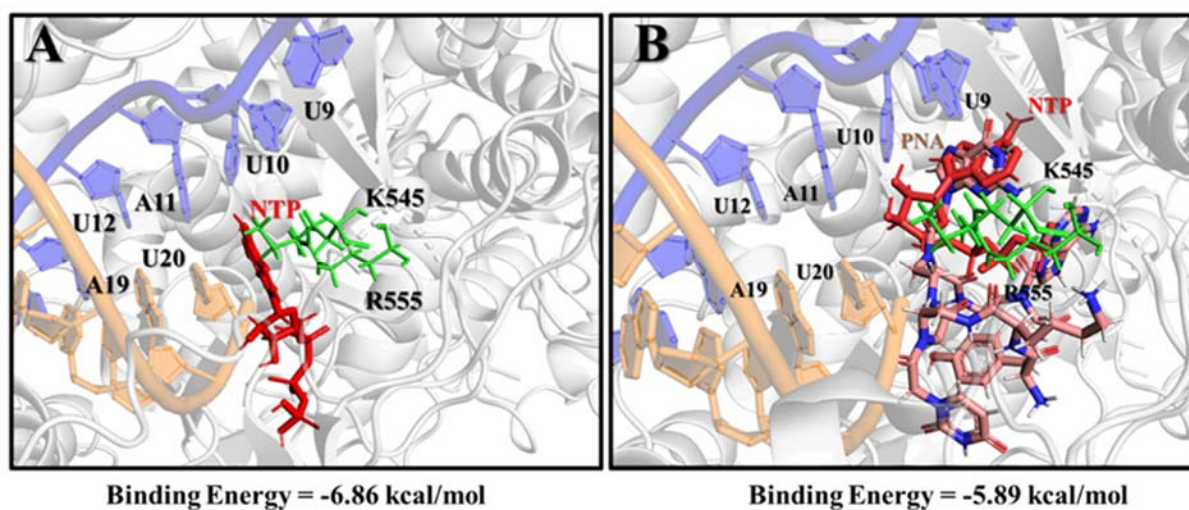

**Figure S7.** The interaction analysis of ATP with RdRp-RNA and RdRp-RNA-PNA complex. **(A)** Close-up view of 3D interaction diagram of ATP with RdRp-RNA (PDB ID: 7BV2) represents ATP incorporation into the primer strand of RNA **(B)** Close-up view of 3D interaction diagram of ATP with RdRp-RNA-PNA-CPP-1 complex represents PNA-CPP-1 incorporation into the primer strand of RNA at the place of ATP, upcoming ATP could not get incorporated at its proper place due to presence of PNA-CPP-1.



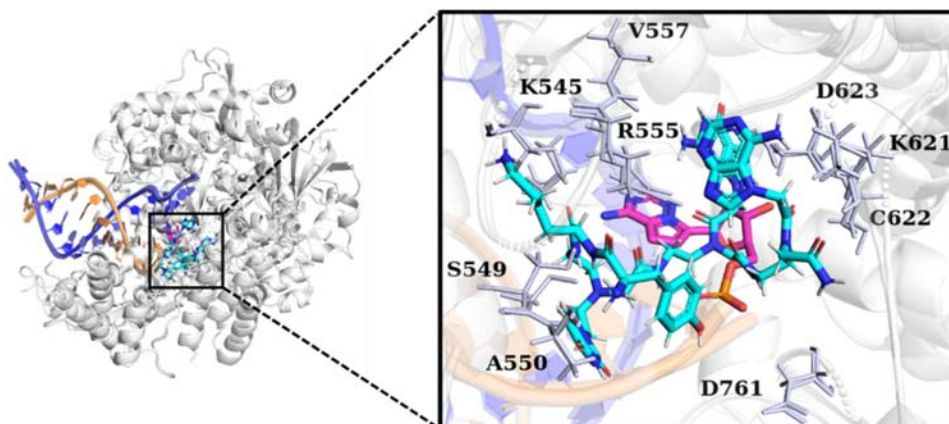

**Figure S8.** Validation of same binding cavity by superimposition of Remdesivir and PNA-CPP-1 complex with RdRp-RNA (PDB ID: 7BV2). PNA-CPP-1 inhibit SARS-CoV-2 transcription by interfering with the function of RNA on its growth site. The cartoon model represents the superimposition of the SARS-CoV-2 RdRp-RNA, shows the conservation of the Remdesivir (standard) binding site and PNA-CPP-1 (designed drug) binding site. Close-up view of the RdRp-RNA binding site, showing key amino acid residues (colored gray) interact with PNA-CPP-1 (colored in cyan) and Remdesivir (colored in purple). The RMSD value of systems aligned by PyMOL is 0.281.

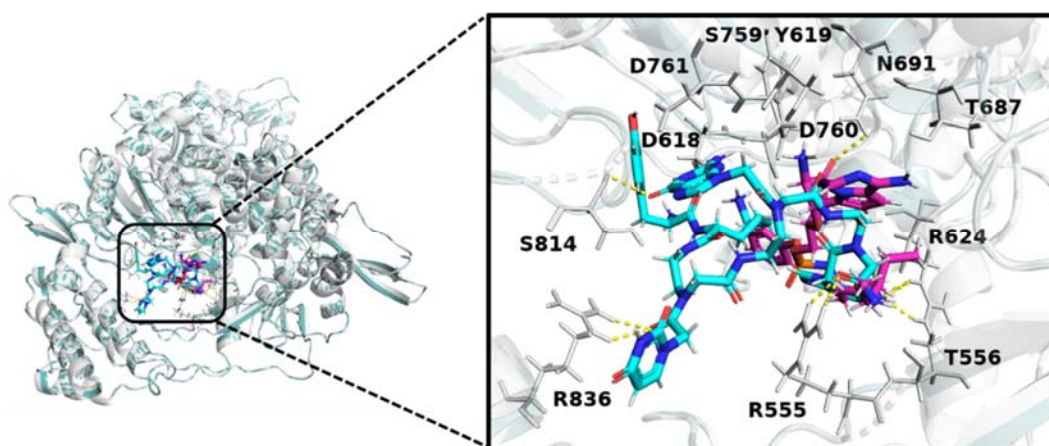

**Figure S9.** Validation of same binding cavity by superimposition of Remdesivir and PNA-CPP-1 complex with RdRp (PDB ID: 7BTF). The cartoon model represents the superimposition of the SARS-CoV-2 RdRp-RNA, shows the conservation of the Remdesivir (standard) binding site and PNA-CPP-1 (designed drug) binding site. Close-up view of the RdRp binding site, showing key amino acid residues (colored gray) interact with PNA-CPP-1 (colored in cyan) and Remdesivir (colored in purple). The RMSD value of systems aligned by PyMOL is 0.051.

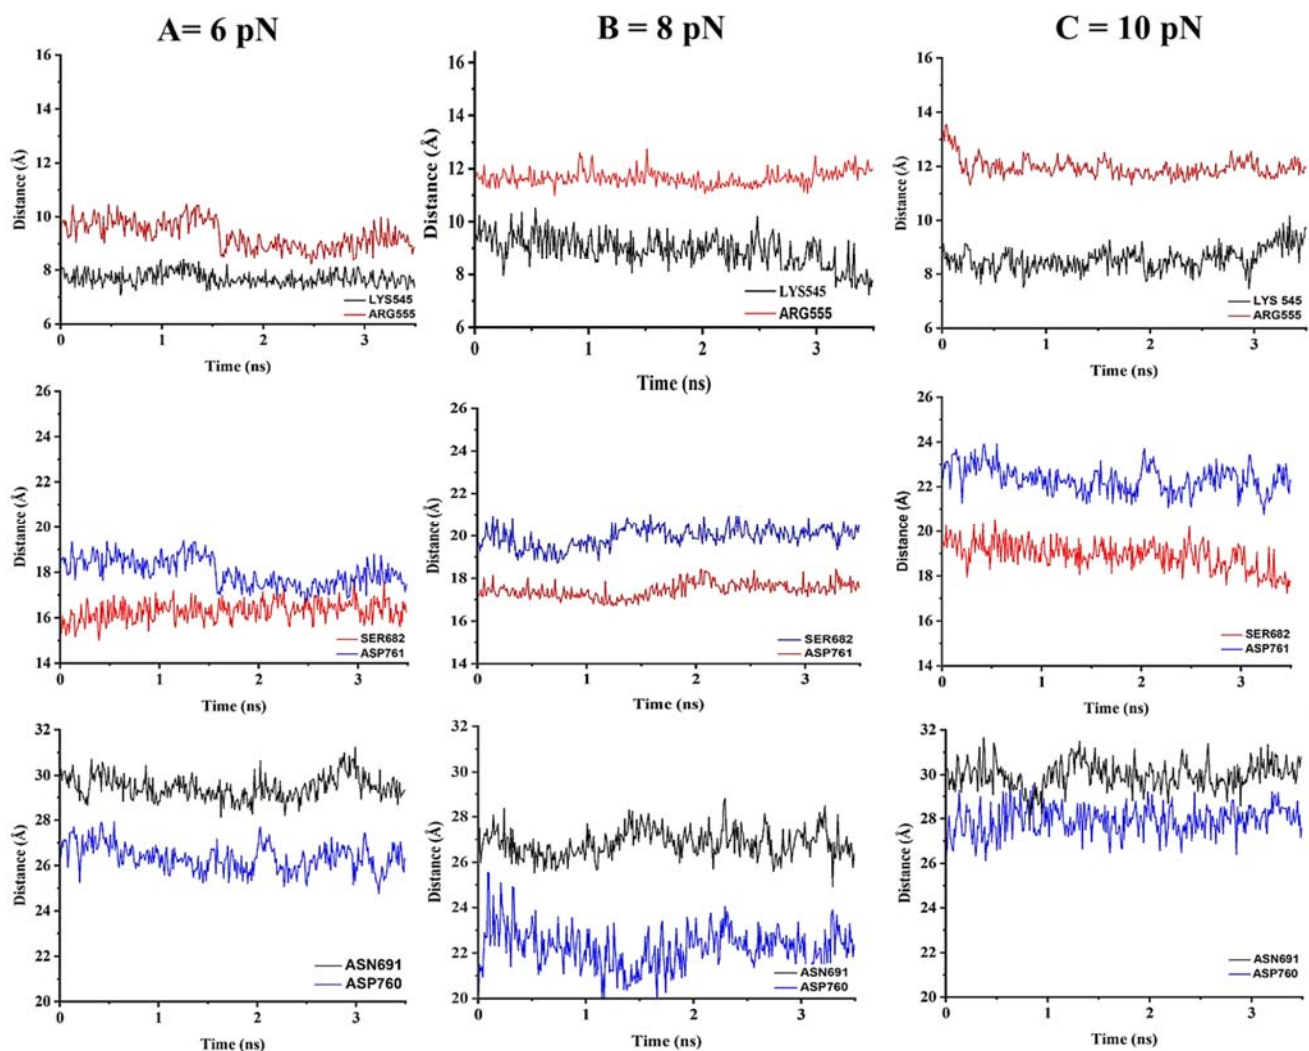

**Figure S10.** Ca distances of the binding pocket residues of PNA-CPP-1-RdRp-RNA (PDB ID: 7BV2) complex during SMD ((A) 6 pN, (B) 8 pN, (C) 10 pN) simulations.

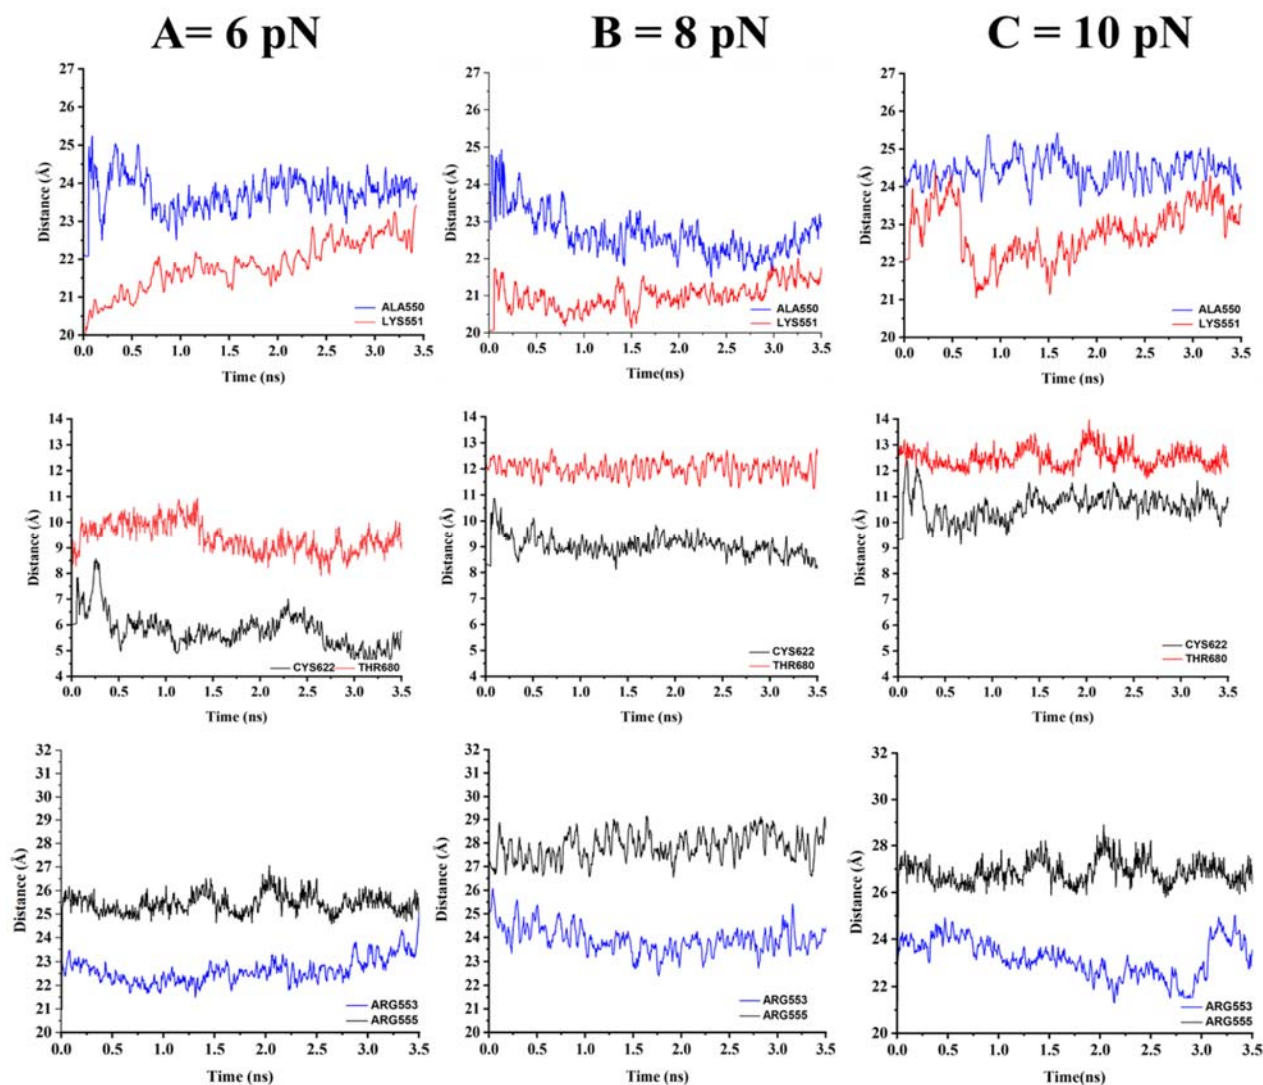

**Figure S11.**  $\text{C}\alpha$  distances of the binding pocket residues of PNA-CPP-1-RdRp (PDB ID: 7BTF) complex during SMD ((A) 6 pN, (B) 8 pN, (C) 10 pN) simulations.

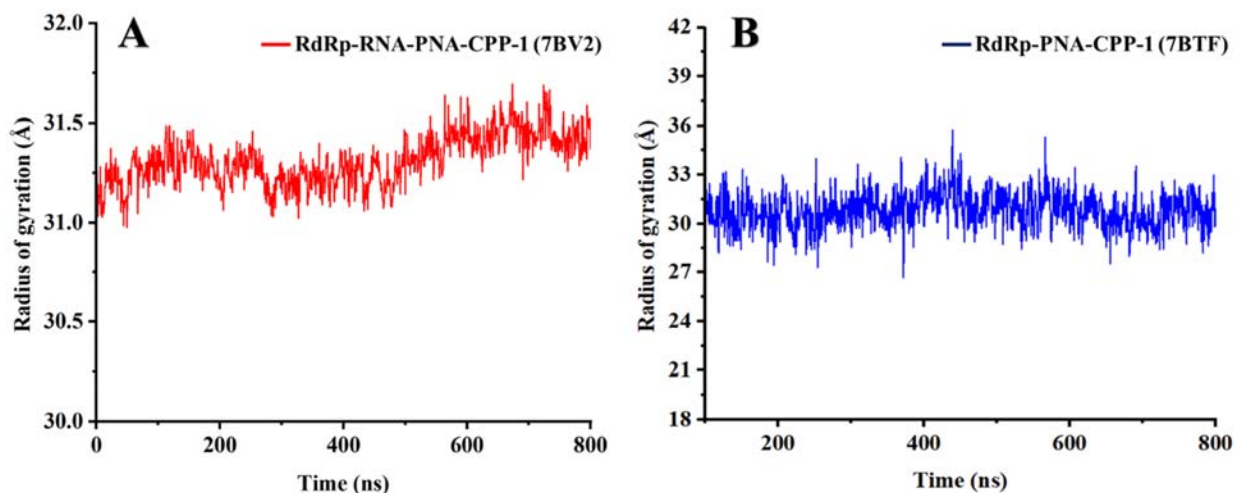

**Figure S12.** Radius of gyration (Rg) of PNA-CPP-1 with RdRp and RdRp-RNA. (A) Rg for RdRp-RNA with PNA-CPP-1 in red color. (B) Rg of RdRp-PNA-CPP-1 complex in blue color.

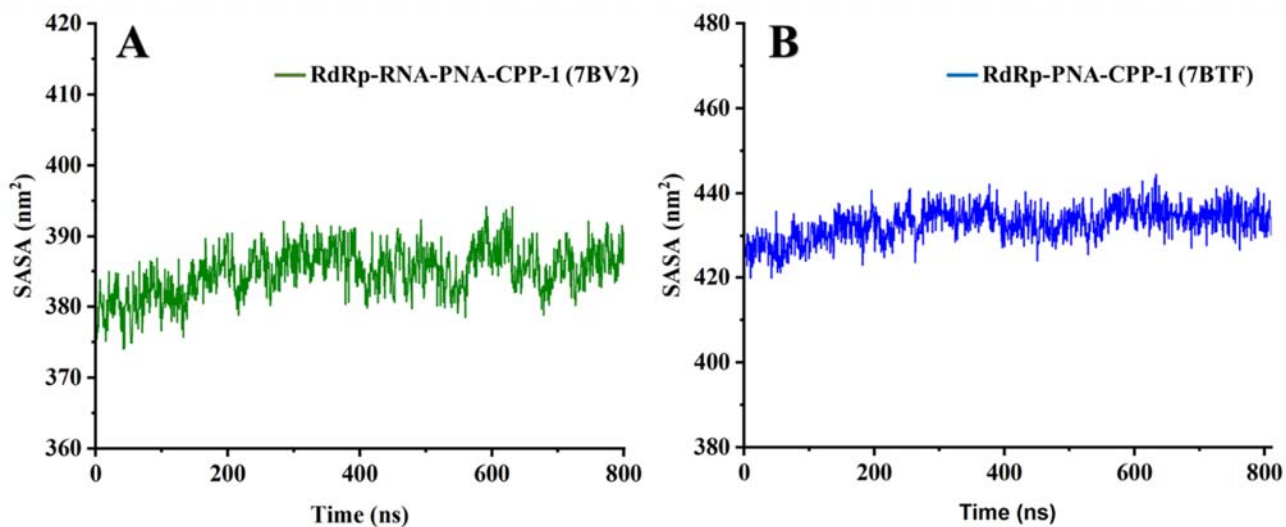

**Figure S13.** SASA analysis of PNA-CPP-1 complexes. The SASA curves highlighting the variation in accessibility of solvent for the complex with the receptor by means of MD simulation. (A) SASA of RdRp-RNA in complex with PNA-CPP-1 (PDB ID: 7BV2). (B) SASA OF RdRp in complex with PNA-CPP-1 (PDB ID: 7BTF).

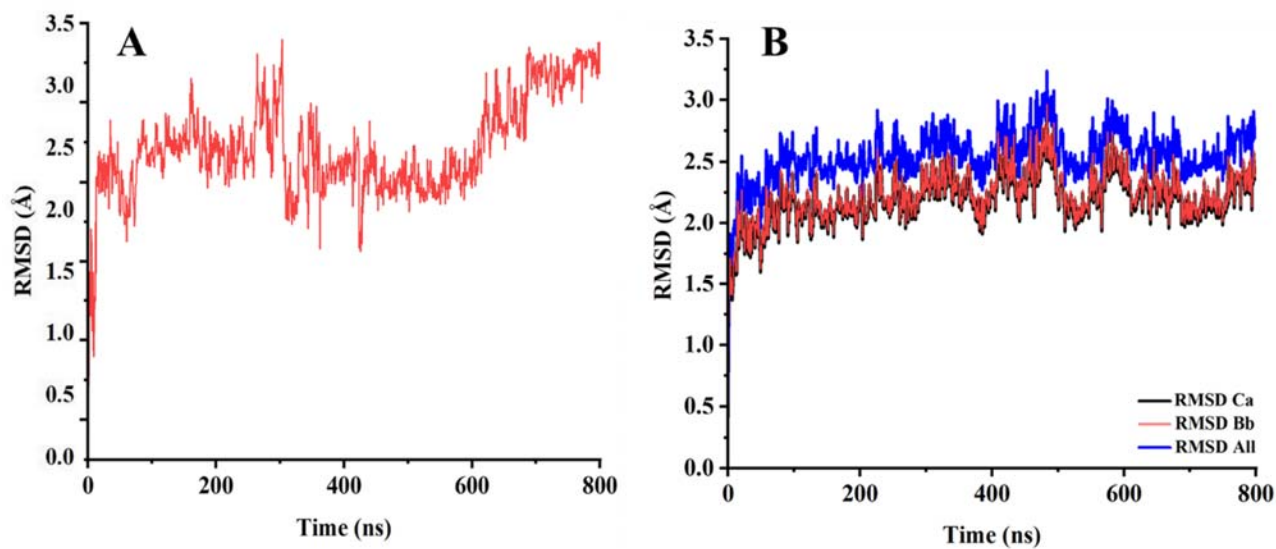

**Figure S14.** The RMSD profiles of 800 ns MD simulations of unbound receptor (RdRp) and ligand (PNA-CPP-1). **(A)** RMSD of all heavy atoms of ligand (colored in red). **(B)** RMSD of the C-Alpha of RdRp colored in black, backbone atoms colored in red and all heavy atoms colored in blue.

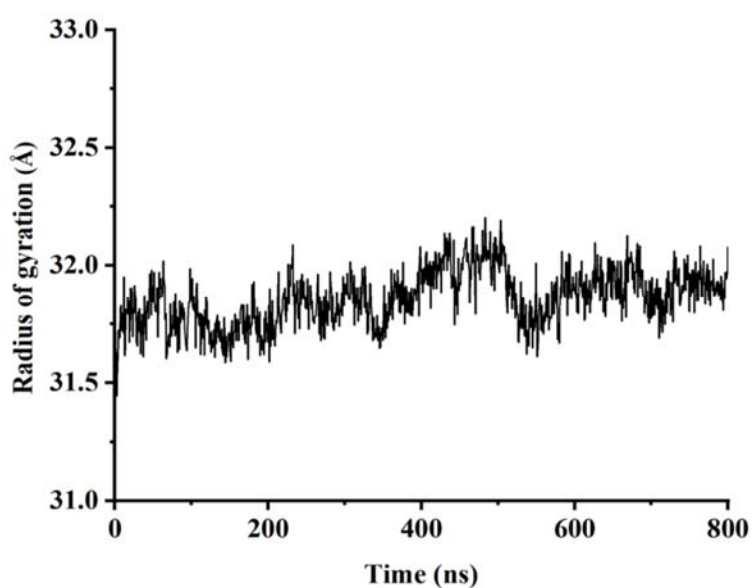

**Figure S15.** Radius of gyration (Rg) of RdRp in the absence of PNA-CPP-1 during 800 ns MD simulation.



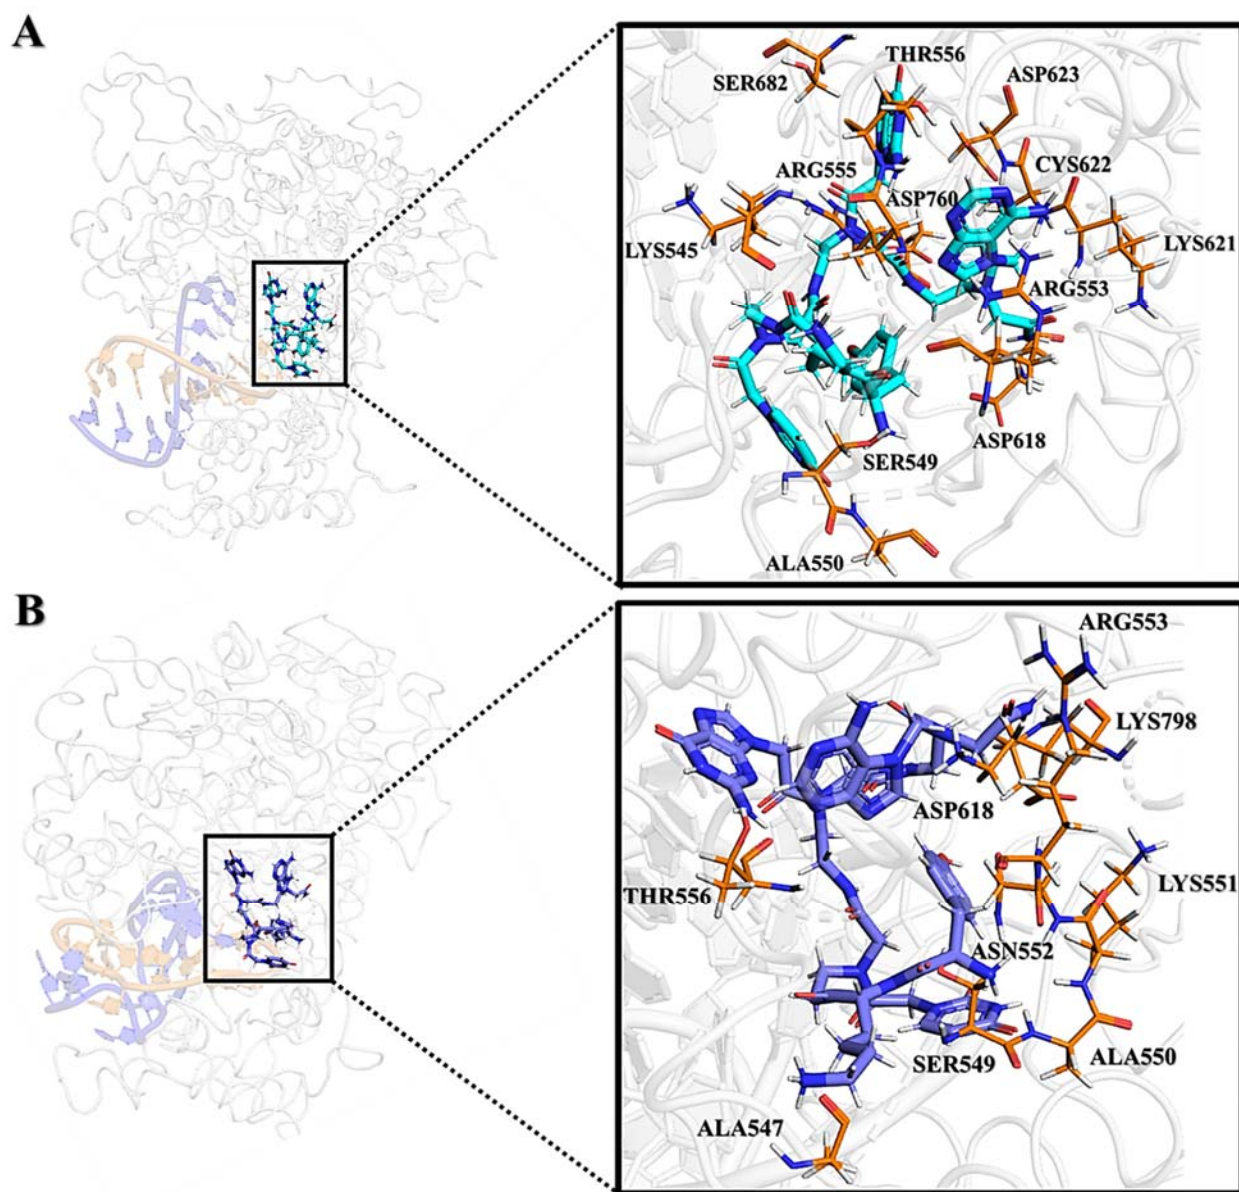

**Figure S16.** Interaction analysis of two complexes of PNA-CPP-1 with RdRp-RNA (PDB ID: 7BV2) including the initial and final structures obtained from MD. **(A)** PNA-CPP-1 complex and binding site residues (ligand colored in Cyan ) at 0 ns. **(B)** PNA-CPP-1 complex and binding site residues (ligand colored in blue) at 800 ns. catalytic residue and other binding site residues are represented in orange sticks. Cartoon model at initial **(A)** and final **(B)** state of MD simulations depicted that PNA-CPP-1 remains in binding cavity with minor fluctuations.

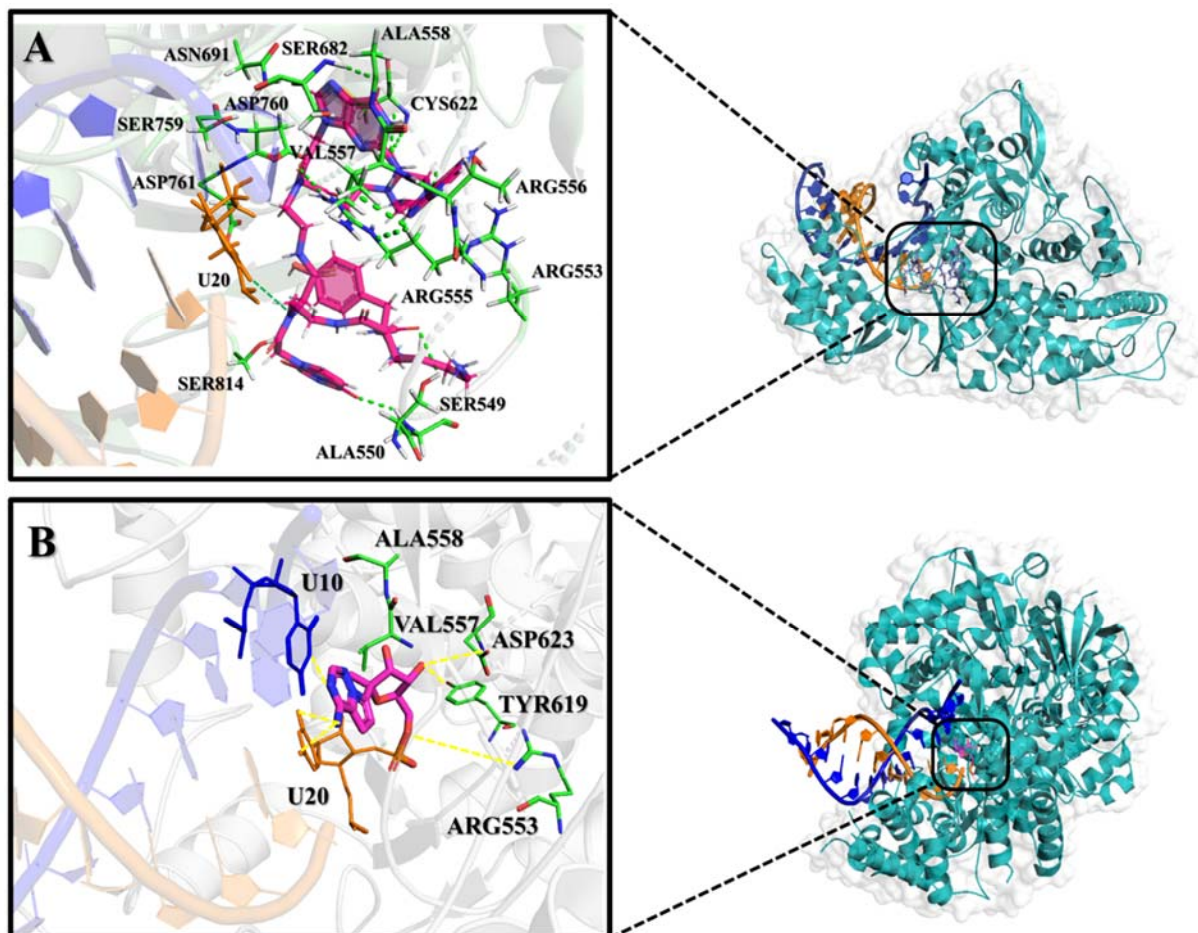

**Figure S17.** The interaction analysis of Remdesivir and PNA-CPP-1 with SARS-CoV-2 RdRp-RNA. **(A)** Close-up view of 3D model of the interaction between PNA-CPP-1 and RdRp-RNA (PDB ID: 7BV2). **(B)** Close-up view of 3D interaction diagram of Remdesivir with RdRp-RNA (PDB ID: 7BV2). The Cartoon model represents the catalytic part of RdRp-RNA. PNA-CPP-1 and Remdesivir bound at the same active sites of RdRp-RNA are represented as cartoon models. Amino acid and nucleotide units which form H-bonds colored by yellow dotted lines.

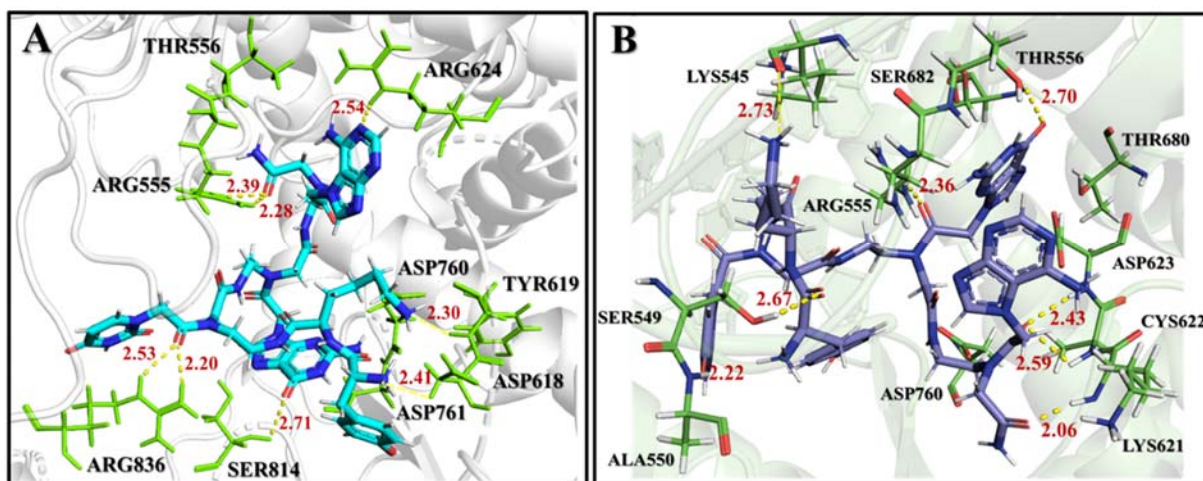

**Figure S18.** The 3D interaction analysis indicating distance between the atoms that form hydrogen bonds. **(A)** 3D Interaction analysis of PNA-CPP1 and the RdRp (PDB ID: 7BTF) showing interatomic distance between atoms that form H-bonds. **(B)** 3D Interaction analysis of PNA-CPP1 and the RdRp-RNA (PDB ID: 7BV2) showing interatomic distance between atoms that form H-bonds.



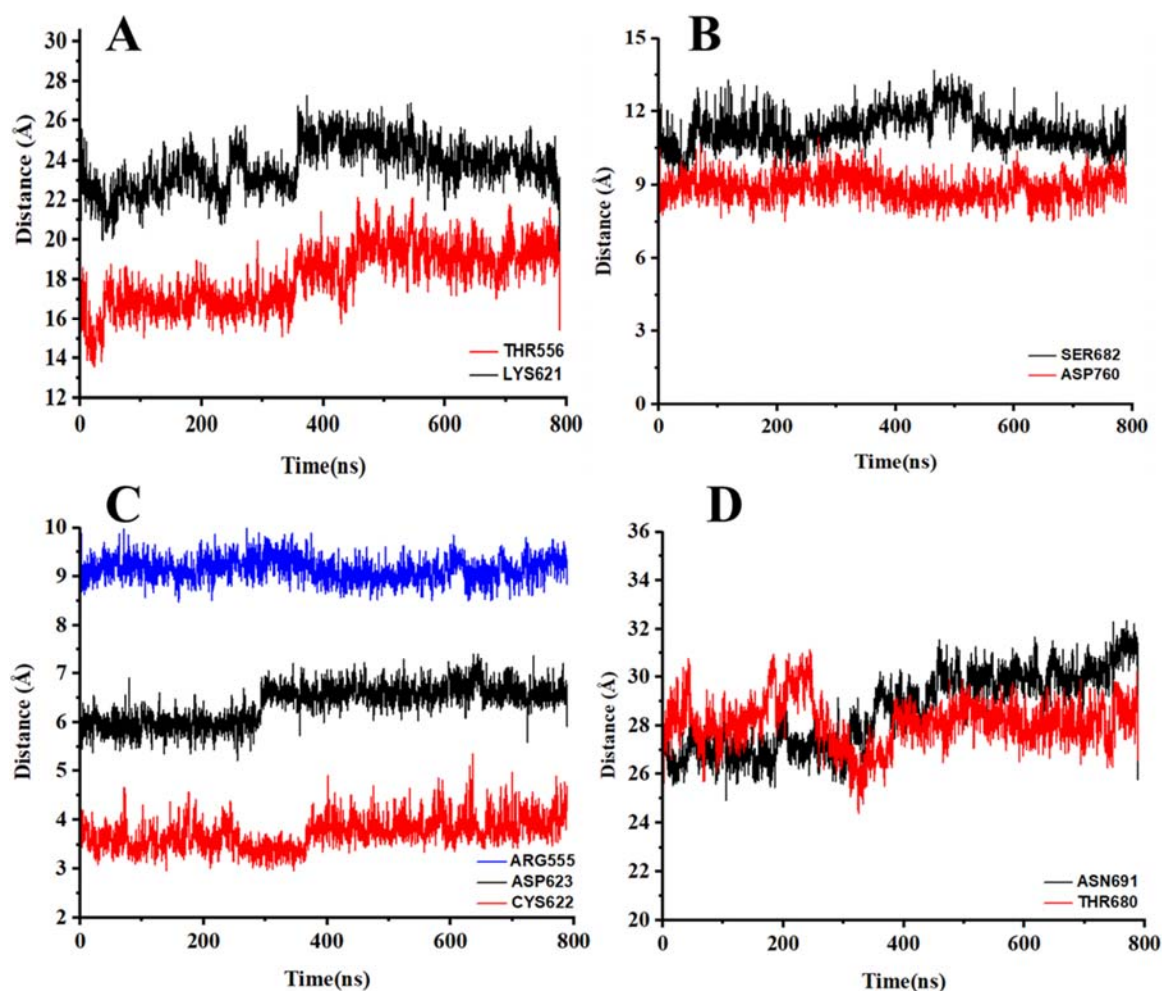

**Figure S19.** The evolution of interatomic distances between chemical functions of the PNA-CPP-1 ligand and key amino acids residues in the binding sites during molecular dynamic simulation. **(A)** LYS621 and THR556 represented the distance between O atom of PNA backbone and N atom of the pyrimidine ring respectively. **(B)** SER682 and ASP760 represented the distance between the O atom of carbonyl group attach with pyrimidine ring of guanine nucleobase and -NH group of PNA backbone respectively. **(C)** ARG555, ASP623, and CYS622 represented the distance between O atom of carbonyl group of PNA backbone, and guanine moiety. **(D)** ASN691, and THR680 represented the distance between N atom of the imidazole ring of nucleobases.

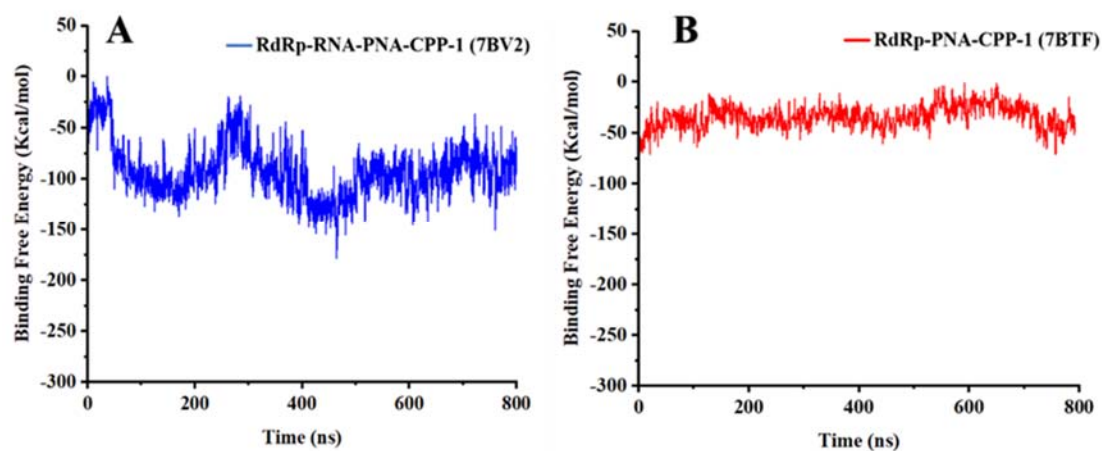

**Figure S20.** MMPBSA analysis of PNA-CPP-1-RdRp and PNA-CPP-1-RdRp-RNA complex. **(A)** Binding-free energy of top hit docked complex (PNA-CPP-1-RdRp-RNA) during 800 ns MD simulation colored in blue **(B)** Binding-free energy of top hit docked complex (PNA-CPP-1-RdRp) during 800 ns MD colored in red.

**Table S1.** The binding free energy PNA-CPP-1 with RdRp and RdRp-RNA by docking and MMPBSA analysis.

| Target   | Scoring (Kcal/mol)                 | PNA-CPP-1 |
|----------|------------------------------------|-----------|
| RdRp     | docking score (SP)                 | -9.40     |
|          | Binding energy (YASARA)            | -9.19     |
|          | MMPBSA $\Delta G_{\text{binding}}$ | -32.27    |
| RdRp-RNA | docking score (SP)                 | -11.46    |
|          | Binding energy (YASARA)            | -9.94     |
|          | MMPBSA $\Delta G_{\text{binding}}$ | -92.06    |



**Table S2.** Potential drug binding cavities of RdRp detected by Cavity Plus. The amino acid residues of druggable cavities 1, 2, 3, and 4.

| No. of Cavities | Amino acid residues of binding site                                                                                                                                                                                                                                                                                                                                                                                                                                                                                                                                                                                                                                                                                                                                                                                                                                                                                                                                                                                                                                                                                                                                                                                                                                                                                                                                                                                                                                                                                                                                                                                  |
|-----------------|----------------------------------------------------------------------------------------------------------------------------------------------------------------------------------------------------------------------------------------------------------------------------------------------------------------------------------------------------------------------------------------------------------------------------------------------------------------------------------------------------------------------------------------------------------------------------------------------------------------------------------------------------------------------------------------------------------------------------------------------------------------------------------------------------------------------------------------------------------------------------------------------------------------------------------------------------------------------------------------------------------------------------------------------------------------------------------------------------------------------------------------------------------------------------------------------------------------------------------------------------------------------------------------------------------------------------------------------------------------------------------------------------------------------------------------------------------------------------------------------------------------------------------------------------------------------------------------------------------------------|
| <b>Cavity 1</b> | ASP:161, TYR:163, ASP:164, PHE:165, VAL:166, GLU:167, GLN:408, THR:409, VAL:410, LYS:411, SER:434, LEU:437, LYS:438, HIS:439, PHE:441, GLN:444, SER:451, ASP:452, TYR:455, TYR:456, ARG:457, TYR:458, VAL:493, ILE:494, VAL:495, ASN:496, ASN:497, LEU:498, ASP:499, LYS:500, SER:501, ALA:502, GLY:503, PHE:506, ASN:507, LYS:508, TRP:509, GLY:510, LYS:511, ALA:512, TYR:516, GLN:541, MET:542, ASN:543, LEU:544, LYS:545, TYR:546, ALA:547, ILE:548, SER:549, ALA:550, LYS:551, ASN:552, ARG:553, ALA:554, ARG:555, THR:556, VAL:557, ALA:558, GLY:559, VAL:560, SER:561, ILE:562, SER:564, THR:565, MET:566, THR:567, ASN:568, ARG:569, GLN:570, PHE:571, HIS:572, GLN:573, LYS:574, LEU:575, LEU:576, LYS:577, SER:578, ILE:579, ALA:580, ALA:581, THR:582, ARG:583, VAL:588, ILE:589, GLY:590, THR:591, SER:592, LYS:593, PHE:594, TYR:595, GLY:597, TRP:598, MET:601, GLY:616, TRP:617, ASP:618, TYR:619, PRO:620, LYS:621, CYS:622, ASP:623, ARG:624, MET:626, GLU:665, LYS:676, GLY:679, THR:680, SER:681, SER:682, GLY:683, ASP:684, ALA:685, THR:686, THR:687, ALA:688, TYR:689, ASN:691, SER:692, MET:756, LEU:758, SER:759, ASP:760, ASP:761, ALA:762, VAL:763, VAL:792, PHE:793, MET:794, SER:795, GLU:796, ALA:797, LYS:798, CYS:799, TRP:800, THR:801, HIS:810, GLU:811, PHE:812, CYS:813, SER:814, GLN:815, HIS:816, PRO:830, TYR:831, PRO:832, ASP:833, PRO:834, SER:835, ARG:836, ILE:837, LEU:838, GLY:839, ALA:840, GLY:841, PHE:843, VAL:844, ASP:845, GLU:857, ARG:858, VAL:860, SER:861, LEU:862, ILE:864, ASP:865, ALA:866, TYR:877, PHE:920, MET:924, TYR:925, VAL:930, LEU:931, GLN:932. |
| <b>Cavity 2</b> | PHE:165, VAL:166, PRO:169, LEU:172, ARG:173, ALA:176, PRO:243, LEU:245, THR:246, LEU:247, THR:248, ARG:249, ALA:250, LEU:251, THR:252, ALA:253, GLU:254, SER:255, HIS:256, LEU:261, TYR:265, ILE:266, LYS:267, TRP:268, ASP:269, LEU:270, LEU:271, LYS:272, TYR:273, ASP:274, PHE:275, ALA:311, ASN:314, VAL:315, LEU:316, PHE:317, SER:318, THR:319, VAL:320, PHE:321, PRO:322, PRO:323, THR:324, SER:325, PHE:326, GLY:327, PRO:328, LEU:329, VAL:330, ARG:331, LYS:332, VAL:341, VAL:342, SER:343, THR:344, GLY:345, TYR:346, HIS:347, PHE:348, ARG:349, GLU:350, HIS:355, ASP:377, PRO:378, ALA:379, MET:380, HIS:381, ALA:382, ALA:383, SER:384, GLY:385, ASN:386, LEU:387, LEU:388, LEU:389, ASP:390, LYS:391, ARG:392, THR:393, THR:394, CYS:395, PHE:396, SER:397, VAL:398, ALA:399, ALA:400, TYR:453, ASP:454, TYR:455, TYR:456, ARG:457, TYR:458, ASN:459, LEU:460, PRO:461, THR:462, MET:463, CYS:464, PRO:537, MET:626, PRO:627, ASN:628, MET:629, LEU:630, CYS:659, ALA:660, LEU:663, SER:664, GLU:665, MET:666, LEU:673, TYR:674, VAL:675, LYS:676, PRO:677, GLY:678, ASN:791.                                                                                                                                                                                                                                                                                                                                                                                                                                                                                                                         |
| <b>Cavity 3</b> | PHE:165, VAL:166, ASN:168, PRO:169, ASP:170, LEU:172, ARG:173, ALA:176, ASN:177, GLY:179, PRO:243, ILE:244, LEU:245, THR:246, LEU:247, THR:248, ARG:249, ALA:250, LEU:251, THR:252, ALA:253, GLU:254, SER:255, HIS:256, LEU:261, PRO:264, TYR:265, ILE:266, LYS:267, TRP:268, LEU:270, LEU:271, LYS:272, TYR:273, ALA:311, ASN:314, VAL:315, LEU:316, PHE:317, SER:318, THR:319, VAL:320, PHE:321, PRO:322, PRO:323, THR:324, SER:325, PHE:326, GLY:327,                                                                                                                                                                                                                                                                                                                                                                                                                                                                                                                                                                                                                                                                                                                                                                                                                                                                                                                                                                                                                                                                                                                                                             |

PRO:328, LEU:329, VAL:330, VAL:341, SER:343, TYR:346, HIS:347, PHE:348, ARG:349, GLU:350, ASP:377, PRO:378, ALA:379, MET:380, HIS:381, ALA:382, ALA:383, LEU:387, LEU:388, LEU:389, ASP:390, LYS:391, ARG:392, THR:393, THR:394, CYS:395, PHE:396, SER:397, VAL:398, ALA:399, TYR:453, ASP:454, TYR:455, TYR:456, ARG:457, TYR:458, ASN:459, LEU:460, PRO:461, THR:462, MET:463, CYS:464, PRO:537, MET:626, PRO:627, ASN:628, MET:629, LEU:630, CYS:659, ALA:660, LEU:663, SER:664, GLU:665, MET:666, LEU:673, TYR:674, VAL:675, LYS:676, PRO:677, GLY:678, ASP:760, ASP:761, TYR:788, ASN:791.

#### Cavity 4

PHE:165, VAL:166, GLU:167, ASN:168, PRO:169, ASP:170, ILE:171, LEU:172, ARG:173, VAL:174, TYR:175, ALA:176, ASN:177, LEU:178, GLY:179, MET:242, PRO:243, ILE:244, LEU:245, THR:246, LEU:247, THR:248, ARG:249, ALA:250, LEU:251, THR:252, ALA:253, GLU:254, SER:255, HIS:256, LEU:261, TYR:265, ASN:314, VAL:315, LEU:316, PHE:317, SER:318, THR:319, VAL:320, PHE:321, PRO:322, PRO:323, THR:324, PHE:326, GLY:327, ARG:349, GLU:350, LYS:391, THR:393, THR:394, CYS:395, PHE:396, SER:397, TYR:453, ASP:454, TYR:455, TYR:456, ARG:457, TYR:458, ASN:459, LEU:460, PRO:461, THR:462, MET:463, CYS:464, LYS:545, TYR:546, ALA:547, ILE:548, SER:549, ALA:550, LYS:551, ASN:552, ARG:553, ALA:554, ARG:555, THR:556, VAL:557, ALA:558, GLY:559, CYS:622, MET:626, PRO:627, ASN:628, MET:629, LEU:663, SER:664, GLU:665, VAL:675, LYS:676, PRO:677, GLY:678, SER:682, THR:687, ASP:760, ASP:761, ALA:762, TYR:787, TYR:788, GLN:789, ASN:790, ASN:791.

**Table S3.** The detailed information on non-bond forces of PNA-CPP-1 leading compound and SARS-CoV-2 RdRp in cavity 1 (PDB ID: 7BTF).

| Receptor [A]—Ligand [B] | Distance [Å] | Angle DHA [°] | Category                       |
|-------------------------|--------------|---------------|--------------------------------|
| A: GLU811:OE2 - B: H493 | 1.98533      | 136.736       | Salt Bridge; Attractive Charge |
| A: ARG553:HH21 - B: O16 | 2.08926      | 142.506       | Conventional Hydrogen Bond     |
| A: SER759: HG - B: N25  | 2.52932      | 124.675       | Conventional Hydrogen Bond     |
| A: TRP800:HE1 - B: O66  | 2.39831      | 153.698       | Conventional Hydrogen Bond     |
| A: SER814:HN - B: O59   | 3.07571      | 103.044       | Conventional Hydrogen Bond     |
| A: ASP623:OD1 - B: H411 | 2.95474      | 105.757       | Conventional Hydrogen Bond     |
| A: ASP623:OD2 - B: H412 | 2.64925      | 107.17        | Conventional Hydrogen Bond     |
| A: SER814: OG - B: H491 | 2.54071      | 90.249        | Conventional Hydrogen Bond     |

|                          |         |         |                            |
|--------------------------|---------|---------|----------------------------|
| A: TRP617: O - B: H63    | 1.99651 | 133.833 | Conventional Hydrogen Bond |
| A: SER549: OG - B: H731  | 2.34924 | 129.922 | Conventional Hydrogen Bond |
| A: LYS798: O - B: H81    | 2.25371 | 114.015 | Conventional Hydrogen Bond |
| A: LYS62: HE2 - B: O40   | 2.81366 | 134.23  | Carbon Hydrogen Bond       |
| B: H122 - A: ASP760: OD2 | 3.00111 | 106.281 | Carbon Hydrogen Bond       |
| A: ARG553: NH1- B        | 4.21481 | /       | Pi-Cation                  |
| A: ARG553: NH1- B        | 3.58842 | /       | Pi-Cation                  |
| A: ASP761: OD2 - B       | 3.21058 | /       | Pi-Anion                   |
| A: LYS621- B             | 5.33223 | /       | Pi-Alkyl                   |
| A: ALA688 - B            | 5.12855 | /       | Pi-Alkyl                   |
| A: LYS621- B             | 5.28462 | /       | Pi-Alkyl                   |

**Table S4.** The detailed information on non-bond forces of PNA-CPP-1 leading compound and SARS-CoV-2 RdRp in cavity 2 (PDB ID: 7BTF).

| Receptor [A]—Ligand [B] | Distance [Å] | Angle DHA [°] | Category                   |
|-------------------------|--------------|---------------|----------------------------|
| A: ARG249: HH21- B: O74 | 3.00205      | 99.381        | Conventional Hydrogen Bond |
| A: ARG249:HH22 - B: O74 | 2.95686      | 102.173       | Conventional Hydrogen Bond |
| A: THR252:HG1 - B: O59  | 2.0322       | 158.612       | Conventional Hydrogen Bond |
| A: ARG349:HH12 - B: O16 | 2.54329      | 108.585       | Conventional Hydrogen Bond |
| A: ARG349:HH22 - B: O16 | 2.78656      | 106.967       | Conventional Hydrogen Bond |
| A: PHE396:HN - B: N34   | 2.54927      | 125.013       | Conventional Hydrogen Bond |
| A: ASN628:HD21- B: N30  | 2.52765      | 101.701       | Conventional Hydrogen Bond |
| A: ASN628:HD22 - B: O40 | 2.53057      | 130.082       | Conventional Hydrogen Bond |
| A: VAL315:O - B: H411   | 2.11805      | 162.513       | Conventional Hydrogen Bond |
| A: ARG457:O - B: H491   | 2.81349      | 114.259       | Conventional Hydrogen Bond |

|                         |         |         |                            |
|-------------------------|---------|---------|----------------------------|
| A: PRO169:O - B: H733   | 1.94454 | 156.735 | Conventional Hydrogen Bond |
| A: THR246: HA - B: O66  | 2.60957 | 163.983 | Carbon Hydrogen Bond       |
| A: ARG249: HD2 - B: O59 | 2.25969 | 166.328 | Carbon Hydrogen Bond       |
| A: THR252: HB - B: O59  | 2.92931 | 114.47  | Carbon Hydrogen Bond       |
| A: ARG349: HD2 - B: N36 | 2.40314 | 128.731 | Carbon Hydrogen Bond       |
| A: PRO169:O - B: H733   | 1.94454 | 156.735 | Conventional Hydrogen Bond |
| A: ASN459:OD1 - B: H31  | 3.04438 | 111.083 | Carbon Hydrogen Bond       |
| A: PRO169:O - B: H722   | 3.03134 | 110.864 | Carbon Hydrogen Bond       |
| A: GLU350:OE2 - B       | 4.66313 | /       | Pi-Anion                   |
| A: ARG457:HD1 - B       | 2.59809 | /       | Pi-Sigma                   |
| A: PRO461- B            | 4.15807 | /       | Pi-Alkyl                   |
| A: PRO677- B            | 5.48671 | /       | Pi-Alkyl                   |
| A: VAL315- B            | 5.25042 | /       | Pi-Alkyl                   |
| A: ARG349- B            | 4.48552 | /       | Pi-Alkyl                   |
| A: PRO461- B            | 3.87342 | /       | Pi-Alkyl                   |
| A: ARG249- B            | 3.56057 | /       | Pi-Alkyl                   |
| A: ARG457- B            | 4.26762 | /       | Pi-Alkyl                   |

**Table S5.** The detailed information on non-bond forces of PNA-CPP-1 leading compound and SARS-CoV-2 RdRp in cavity 3 (PDB ID: 7BTF).

| Receptor [A]—Ligand [B] | Distance<br>[Å] | Angle DHA [°] | Category                   |
|-------------------------|-----------------|---------------|----------------------------|
| A: TRP268:HN - B: O81   | 2.07776         | 152.111       | Conventional Hydrogen Bond |
| A: ARG349:HH12 - B: O15 | 2.67535         | 116.35        | Conventional Hydrogen Bond |
| A: ARG349:HH21 - B: O43 | 2.8454          | 90.709        | Conventional Hydrogen Bond |

|                              |         |         |                            |
|------------------------------|---------|---------|----------------------------|
| A: SER397:HN - B: O65        | 2.26072 | 161.09  | Conventional Hydrogen Bond |
| A: ASN628:HD21 - B: N30      | 2.7314  | 105.039 | Conventional Hydrogen Bond |
| A: ASN628:HD22 - B: O40      | 2.35662 | 128.268 | Conventional Hydrogen Bond |
| A: THR319:O - B: H11         | 2.69532 | 98.564  | Conventional Hydrogen Bond |
| A: VAL315:O - B: H411        | 1.98844 | 151.848 | Conventional Hydrogen Bond |
| A: THR246:O - B: H421        | 2.89504 | 103.669 | Conventional Hydrogen Bond |
| A: THR252:O - B: H732        | 2.70463 | 135.433 | Conventional Hydrogen Bond |
| A: THR252:OG1- B: H732       | 2.49399 | 123.768 | Conventional Hydrogen Bond |
| A: ARG349:HD2 - B: N36       | 2.3887  | 132.252 | Carbon Hydrogen Bond       |
| A: PHE396: HA - B: O65       | 2.62652 | 153.446 | Carbon Hydrogen Bond       |
| A: THR394:O - B: H521        | 2.35297 | 166.252 | Carbon Hydrogen Bond       |
| A: THR394:O - B: H572        | 2.58983 | 145.601 | Carbon Hydrogen Bond       |
| A: GLU350:OE2 - B            | 4.66278 | /       | Pi-Anion                   |
| A: ARG249:C,O; ALA250: N - B | 4.27009 | /       | Amide-Pi Stacked           |
| A: ARG249- B                 | 3.85385 | /       | Pi-Alkyl                   |
| A:PRO461- B                  | 4.03475 | /       | Pi-Alkyl                   |
| A: ARG249 - B                | 3.73677 | /       | Pi-Alkyl                   |
| A: VAL315 - B                | 5.22027 | /       | Pi-Alkyl                   |
| A: ARG349 - B                | 4.44396 | /       | Pi-Alkyl                   |
| A:PRO461- B                  | 3.898   | /       | Pi-Alkyl                   |
| A:PRO322 - B                 | 4.97322 | /       | Pi-Alkyl                   |

---



**Table S6.** The detailed information on non-bond forces of PNA-CPP-1 leading compound and SARS-CoV-2 RdRp in cavity 4 (PDB ID: 7BTF).

| Receptor [A]—Ligand [B] | Distance [Å] | Angle DHA [°] | Category                   |
|-------------------------|--------------|---------------|----------------------------|
| A: ASP618:OD2 - B: N49  | 5.57538      | /             | Attractive Charge          |
| A: ASP452:OD1 - B: N73  | 4.74484      | /             | Attractive Charge          |
| A: ASP623:OD2 - B: N73  | 3.89186      | /             | Attractive Charge          |
| A: HIS439:HD1 - B: O40  | 2.44846      | 134.671       | Conventional Hydrogen Bond |
| A: ALA550:HN - B: O81   | 2.2957       | 126.482       | Conventional Hydrogen Bond |
| A: ARG553:HH12 - B: O15 | 2.11746      | 145.774       | Conventional Hydrogen Bond |
| A: ARG553:HH21 - B: O16 | 2.35137      | 133.684       | Conventional Hydrogen Bond |
| A: ARG553:HH22 - B: O15 | 2.34747      | 138.296       | Conventional Hydrogen Bond |
| A: ARG555:HH11 - B: O16 | 2.76977      | 97.714        | Conventional Hydrogen Bond |
| A: CYS622:HN - B: O69   | 2.50517      | 166.842       | Conventional Hydrogen Bond |
| A: THR687:HG1 - B: N32  | 2.1892       | 126.011       | Conventional Hydrogen Bond |
| A: SER814: HG - B: O43  | 2.43739      | 100.341       | Conventional Hydrogen Bond |
| A: ARG836: HE - B: O40  | 2.23134      | 163.437       | Conventional Hydrogen Bond |
| A: ARG836:HH12 - B: O66 | 2.97092      | 109.798       | Conventional Hydrogen Bond |
| A: ILE548:O - B: H38    | 2.82832      | 99.222        | Conventional Hydrogen Bond |
| A: SER814: OG - B: H63  | 2.32227      | 144.661       | Conventional Hydrogen Bond |
| A: THR687: HB - B: N25  | 2.9903       | 120.121       | Carbon Hydrogen Bond       |
| A: ASP623:OD2 - B: H51  | 2.99954      | 122.728       | Carbon Hydrogen Bond       |
| A: ASP760:O - B: H522   | 2.68174      | 136.194       | Carbon Hydrogen Bond       |
| A: ASP760:OD2 - B: H551 | 2.881        | 135.131       | Carbon Hydrogen Bond       |
| A: ASP760:OD2 - B: H671 | 2.98552      | 128.904       | Carbon Hydrogen Bond       |

|                         |         |         |                      |
|-------------------------|---------|---------|----------------------|
| A: ASP623:OD2 - B: H721 | 2.86693 | 130.246 | Carbon Hydrogen Bond |
| A: ARG836:NH1 - B       | 4.29272 | /       | Pi-Cation            |
| A: ARG836:NH1 - B       | 4.47624 | /       | Pi-Cation            |
| A: GLU811:OE2 - B       | 3.94431 | /       | Pi-Anion             |
| A: ALA688 - B           | 5.15595 | /       | Pi-Alkyl             |
| A: LYS551 - B           | 4.06753 | /       | Pi-Alkyl             |

**Table S7.** The detailed information on non-bond forces of PNA-CPP-1 leading compound in Remdesivir binding cavity targeting template RNA in complex with RdRp of SARS-CoV-2 (PDB ID: 7BV2).

| Receptor [A]—Ligand [B] | Distance [Å] | Angle DHA [°] | Category                   |
|-------------------------|--------------|---------------|----------------------------|
| A: SER549: HG - B: O74  | 2.66643      | 99.709        | Conventional Hydrogen Bond |
| A: ALA550:H - B: O66    | 2.21942      | 142.082       | Conventional Hydrogen Bond |
| A: ARG555:HH21 - B: N36 | 2.76806      | 97.082        | Conventional Hydrogen Bond |
| A: ARG555:HH22 - B: O43 | 2.26354      | 109.185       | Conventional Hydrogen Bond |
| A: LYS621:H - B: O15    | 2.0563       | 164.407       | Conventional Hydrogen Bond |
| A: CYS622:H - B: O21    | 2.59497      | 109.218       | Conventional Hydrogen Bond |
| A:ASP623:H - B: O21     | 2.4264       | 161.396       | Conventional Hydrogen Bond |
| A: THR680:HG1 - B: N30  | 2.56756      | 94.093        | Conventional Hydrogen Bond |
| A: SER682:H - B: O40    | 2.36474      | 122.212       | Conventional Hydrogen Bond |
| A: ASP760:OD2 - B:H7    | 2.33056      | 117.792       | Conventional Hydrogen Bond |
| A: THR556:O - B:H411    | 2.78919      | 107.047       | Conventional Hydrogen Bond |
| A: SER549: OG - B: H493 | 1.88017      | 146.29        | Conventional Hydrogen Bond |
| A: LYS545:O - B: H732   | 2.73278      | 90.192        | Conventional Hydrogen Bond |
| A: LYS545:O - B: H733   | 2.69832      | 92.118        | Conventional Hydrogen Bond |

|                        |         |         |                                   |
|------------------------|---------|---------|-----------------------------------|
| P: U20:O1P - B: H81    | 2.21675 | 131.946 | Conventional Hydrogen Bond        |
| A: HIS439:HD2 - B: O66 | 2.95477 | 119.163 | Carbon Hydrogen Bond              |
| A: ARG555:HD2 - B: O69 | 2.32149 | 151.379 | Carbon Hydrogen Bond              |
| A:PRO620: HA - B: O15  | 2.3486  | 150.497 | Carbon Hydrogen Bond              |
| A: SER681: HA - B: O40 | 2.87001 | 128.163 | Carbon Hydrogen Bond              |
| A: SER682: HA - B: N30 | 2.96767 | 113.652 | Carbon Hydrogen Bond              |
| A: ASP760:OD2- B: H52  | 2.94577 | 111.914 | Carbon Hydrogen Bond              |
| A: ASP760:OD1- B: H91  | 2.8626  | 104.68  | Carbon Hydrogen Bond              |
| A: ASP761:OD1- B: H92  | 2.82419 | 107.19  | Carbon Hydrogen Bond              |
| A: ASP623:OD1- B:H192  | 3.09782 | 113.932 | Carbon Hydrogen Bond              |
| P: U20:O2P - B:H521    | 2.56451 | 164.966 | Carbon Hydrogen Bond              |
| P: U20:O4 - B:H551     | 2.62076 | 136.592 | Carbon Hydrogen Bond              |
| P: A19:O2P - B:H571    | 2.18767 | 173.207 | Carbon Hydrogen Bond              |
| P: U20:O2P - B:H572    | 2.54793 | 168.094 | Carbon Hydrogen Bond              |
| A: ARG553:O - B:H722   | 3.07145 | 121.398 | Carbon Hydrogen Bond              |
| A: ARG553:NH1 - B      | 3.38997 | /       | Pi-Cation                         |
| A: ARG553:NH2 - B      | 3.25016 | /       | Pi-Cation; Pi-Donor Hydrogen Bond |
| A: ASP623:OD1 - B      | 3.4964  | /       | Pi-Anion                          |
| A: ASP623:OD2 - B      | 3.20976 | /       | Pi-Anion                          |
| A: SER682:HB2 - B      | 2.7343  | /       | Pi-Sigma                          |
| A: ARG555 - B          | 5.46369 | /       | Pi-Alkyl                          |
